# Supplementary material
Source: PubMed Central journal article supplement (PMC6677854)
Supplement: AEM.00990-19-s0001.pdf [file AEM.00990-19-s0001.pdf]

|                              |                  | yhaV | mqsR | tse2 |
|------------------------------|------------------|------|------|------|
| <b>Alphaproteobacteria</b>   | Ehrlichia        | ○    | ○    | ○    |
|                              | Anaplasma        | ○    | ○    | ○    |
|                              | Wolbachia        | ○    | ○    | ○    |
|                              | Rickettsia       | ○    | ○    | ○    |
|                              | Brucella         | ○    | ○    | ○    |
|                              | Bartonella       | ○    | ○    | ○    |
| <b>Betaproteobacteria</b>    | Burkholderia     | ○    | ×    | ○    |
|                              | Neisseria        | ×    | ○    | ○    |
|                              | Bordetella       | ×    | ×    | ○    |
| <b>Gammaproteobacteria</b>   | Legionella       | ×    | ○    | ○    |
|                              | Francisella      | ○    | ○    | ○    |
|                              | Moraxella        | ○    | ○    | ○    |
|                              | Acinetobacter    | ○    | ○    | ×    |
|                              | Pseudomonas      | ○    | ○    | ×    |
|                              | Stenotrophomonas | ○    | ○    | ○    |
|                              | Shewanella       | ○    | ○    | ○    |
|                              | Aeromonas        | ○    | ○    | ○    |
|                              | Vibrio           | ○    | ○    | ○    |
|                              | Haemophilus      | ○    | ○    | ○    |
|                              | Pasteurella      | ○    | ○    | ○    |
|                              | Hafnia           | ○    | ×    | ○    |
|                              | Pantoea          | ×    | ○    | ○    |
|                              | Yersinia         | ○    | ×    | ○    |
|                              | Serratia         | ○    | ○    | ○    |
|                              | Klebsiella       | ×    | ×    | ○    |
|                              | Raoultella       | ○    | ○    | ○    |
|                              | Enterobacter     | ×    | ○    | ○    |
|                              | Citrobacter      | ×    | ○    | ○    |
|                              | Salmonella       | ×    | ○    | ○    |
| Escherichia                  | ×                | ×    | ○    |      |
| Shigella                     | ×                | ×    | ○    |      |
| Proteus                      | ×                | ○    | ○    |      |
| Morganella                   | ○                | ○    | ○    |      |
| Providencia                  | ○                | ○    | ○    |      |
| <b>Epsilonproteobacteria</b> | Helicobacter     | ○    | ○    | ○    |
|                              | Campylobacter    | ○    | ○    | ○    |

**Fig S1** Toxin(s) predicted to be useful (green open circle) in diverse pathogens based on absence of toxin homolog by BLASTP in high confidence genomes deposited in NCBI. Red X's denote presence of toxin gene.

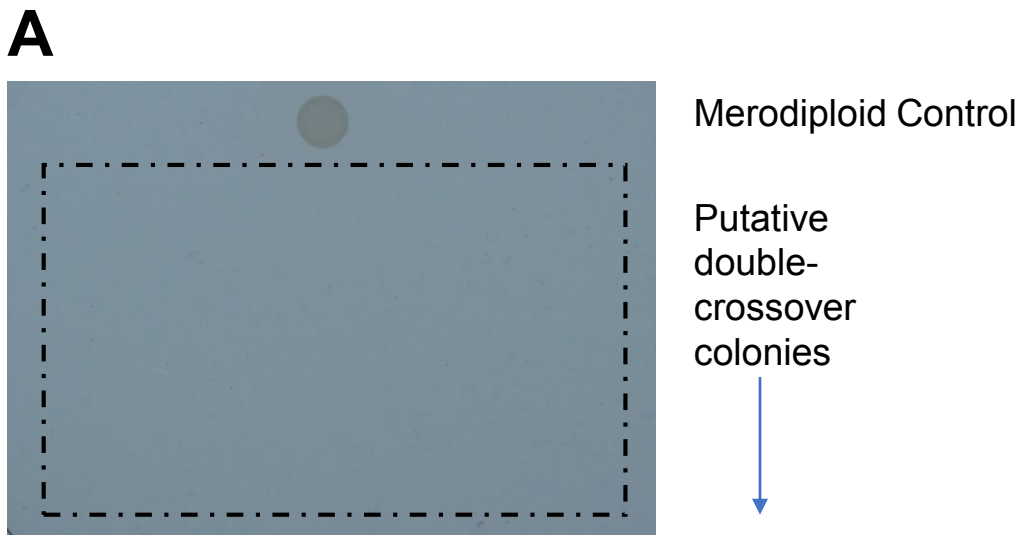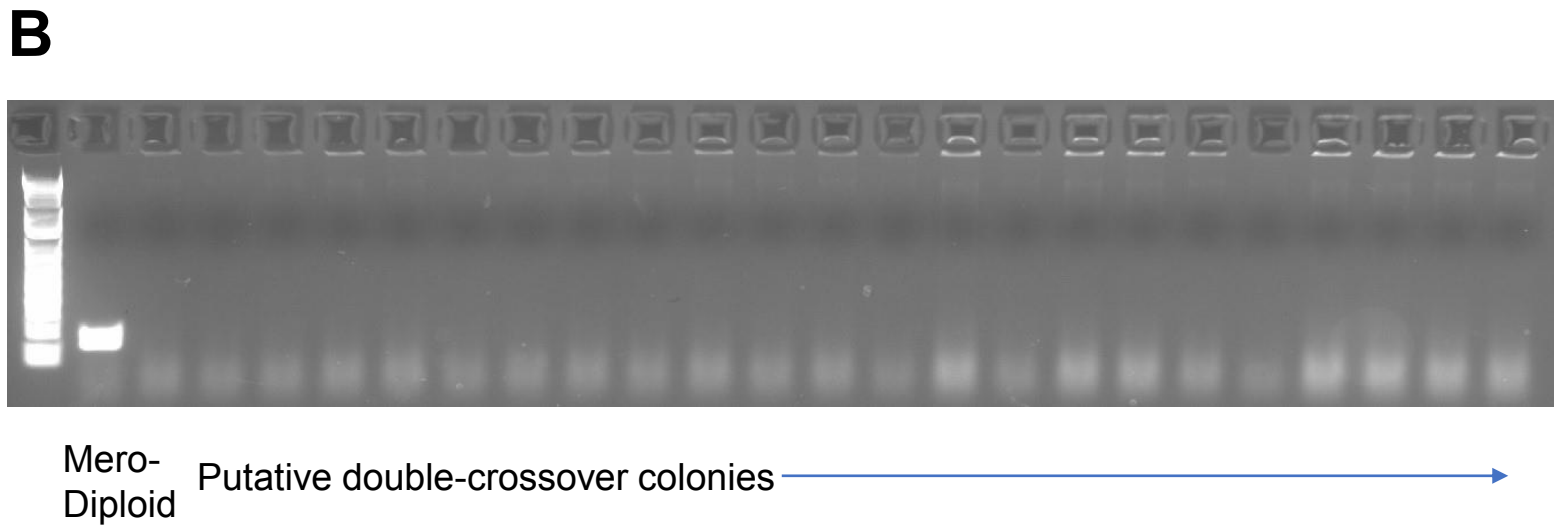

**Fig S2** Putative double-crossover *S. marcescens* colonies (for each toxin, 23 colonies from 3 different crossovers) were randomly selected for characterization. A) A colony was resuspended in non-selective LB and then spotted onto LB+chloramphenicol. The top colony is the merodiploid positive control. There is no growth where the putative double-crossover colonies were spotted (hatched box). B) Colony PCR was performed for a small intergenic amplicon (between *rhaS* and the chloramphenicol resistance promoter) to test for presence of retained pTOX. The first lane is the merodiploid positive control.

**A**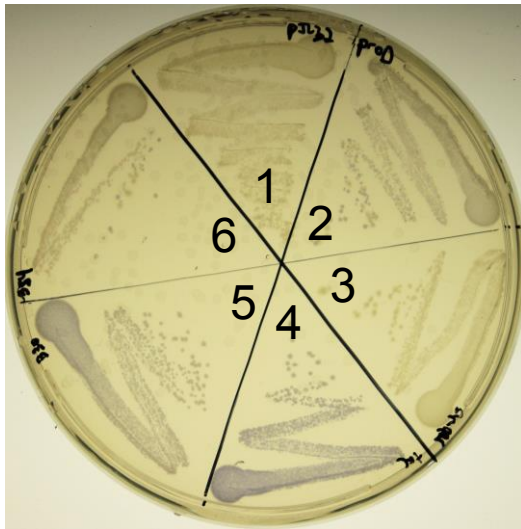**B**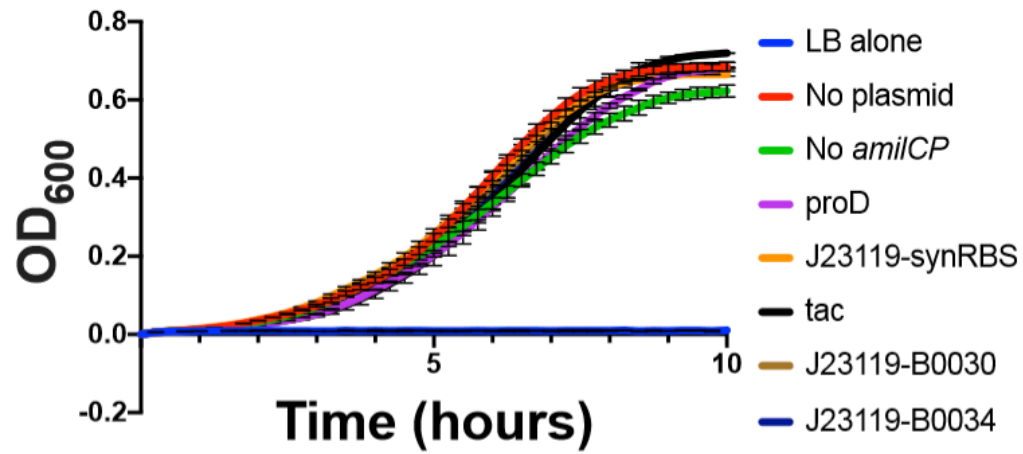

**Fig S3** A) *E. coli* donors containing pTOX vectors with *amilCP* and various promoters and ribosome binding sites (RBS) at 24h at 37°C. From top, clockwise: 1) pTOX with no *amilCP*; 2) pTOX-*amilCP* with proD promoter; 3) pTOX-*amilCP* with J23119 promoter and synthetic RBS; 4) pTOX-*amilCP* with tac promoter; 5) and 6) pTOX-*amilCP* with J23119 promoter with the B0030 or B0034 RBS, respectively. B) Growth curves for *E. coli* donor strains (or LB alone) containing pTOX with *amilCP* driven by indicated promoter/RBS.

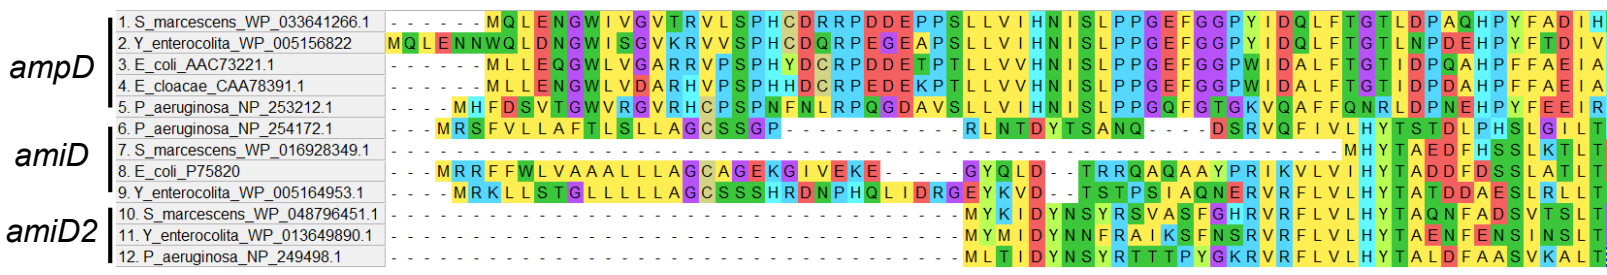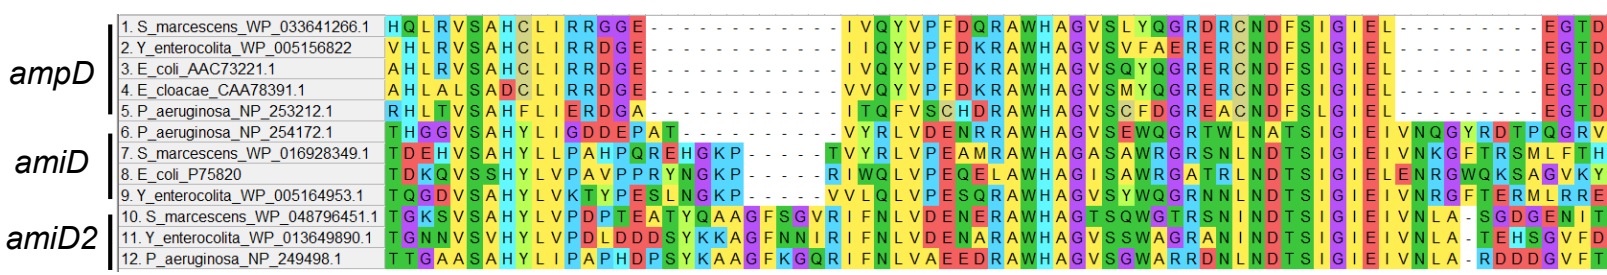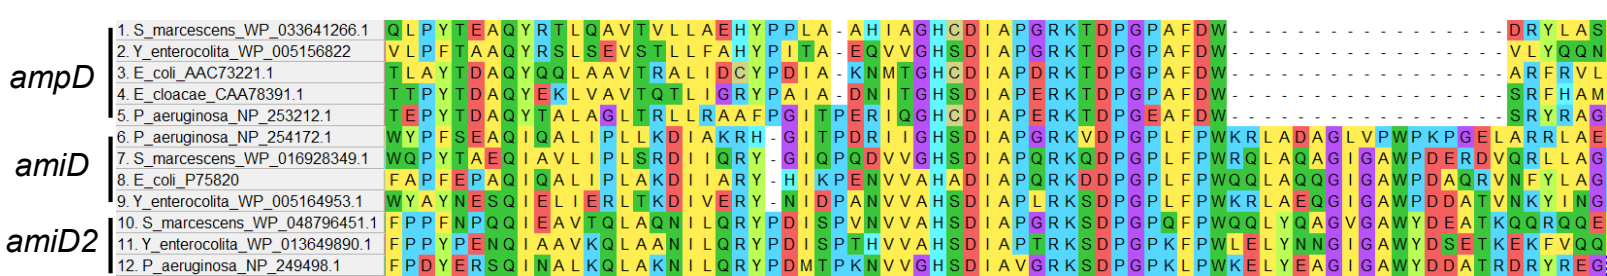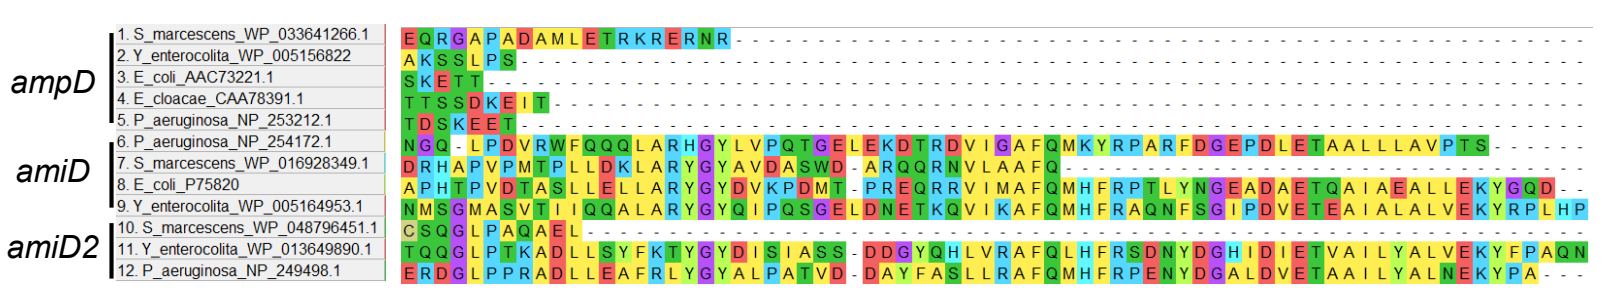

**Fig S4** Indicated sequences were aligned in MEGA X using the MUSCLE algorithm (with the UPGMA method). The results are depicted as sequential (reading from left to right from the first through fourth panel) primary sequences.

*ampD* locus

*amiD* locus

*amiD2* locus

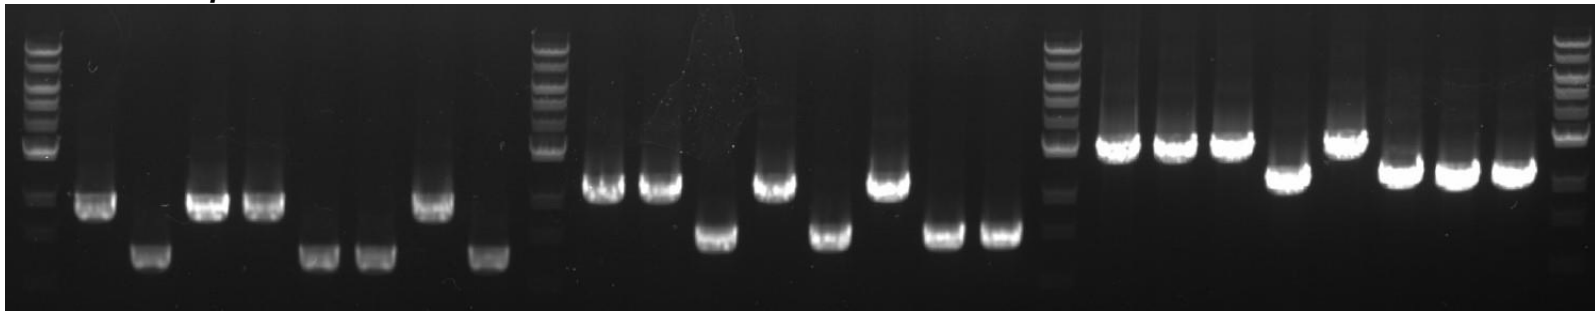

**Fig S5** PCR-based genotyping of *S. marcescens* amidohydrolase mutations. Lanes from left to right: marker, Wt,  $\Delta ampD$ ,  $\Delta amiD$ ,  $\Delta amiD2$ ,  $\Delta ampD\Delta amiD$ ,  $\Delta ampD\Delta amiD2$ ,  $\Delta amiD\Delta amiD2$ ,  $\Delta ampD\Delta amiD\Delta amiD2$ . The *ampD* locus was amplified with prJL53 and prJL54; *amiD* with prJL55 and prJL56; and *amiD2* with prJL57 and prJL58

## **Supplemental Text 1**

### **Sequence 1 – Codon-optimized *rhaS* with promoter**

cgcggaaccctattgtttatcttaataacattcaaatatgtatccgctcatgagacaataaccctgataaatgcttcaataatattgaa  
aaaggaagagtATGACGGTGCTGCACTCGGTTGACTTCTCCCTAGCGGCAATGCCAGCGTTG  
CCATTGAGCCGCGCCTGCCTCAAGCCGACTTCCCGGAGCACCACCACGACTTCCACGAGA  
TCGTTATCGTGGAGCACGGTACCGGCATCCACGTTTTCAACGGCCAACCGTACACGATTAC  
GGCGGTACCGTGTGCTTCGTTTCGTGATCACGACCGCCACTTATACGAGCACACGGACAA  
CTTATGCTTAACCAACGTTTTATACCGTAGCCCTGACCGCTTCCAATTCTGGCGGGCTTA  
AACCAACTGTTACCGCAGGAATTAGACGGCCAATACCCTAGCCATTGGCGTGTGAATCATT  
CGGTGCTGCAACAAGTTCGCCAATTAGTGGCGCAAATGGAGCAACAAGAGGGCGAGAACG  
ACCTGCCGAGCACGGCGAGCCGTGAAATTCTGTTTCATGCAGCTGTTACTGCTGTTACGCA  
AGTCGAGCCTGCAAGAAAATTTAGAGAATTCGGCGAGCCGCCTGAATCTGCTGTTAGCGT  
GGTTAGAAGATCACTTCGCGGACGAAGTTAACTGGGATGCGGTTGCCGACCAGTTCAGCC  
TGAGCTTACGCACCCTGCACCGCCAATGAAACAACAGACCGGCTTAACCCCGCAACGCT  
ATTTAAACCGTTTACGCTTAATGAAGGCGCGCCACTTACTGCGCCATTTCGGAAGCGTCGGT  
GACCGATATTGCGTACCACTGTGGCTTTTTCGGATAGCAATCATTTTCAGCACCTGTTCCGT  
CGCGAATTCAATTGGAGCCCTCGCGACATCCGCCAAGGCCGCGACGGTTTCTTACAGTGA

### **Sequence 2 – Forward terminator and expanded polylinker**

AGCTTCGAGCTAATCGcgcaaaaaaccccgcttcggcggggtttttcgTGATCACGTACGATATCTTCGA  
ACCGGTGCACATGGTGTACAGGGCCCTAGGATAGGACGTCTTAAGGTTTAAACCAGGTTA  
ATTAATTTAAATGCATCCCGGGACGTCTCGAGCTCGATCGGACCGCGGCCGCTAGCACGT  
ATACCAAGTGTCTGT

### **Sequence 3 – Synthetic strong ribosome binding site**

ttatcttaataacattcaaatatgtatccgctcatgagacaataaccctgataaatgcttcaataatattgaaaaaggaGCTTATC  
ACCGATAAGGAGGTTTTTTAATGACGGTGCTGCACTCGGTTGACTTCTCCCTAGCGGCAA  
TGCCAGCGTTGCCATTGAGCCGCGCCTGCCTCAAGCCGACTTCCCGGAGCAC

### **Sequence 4 – *amiCP* with tac promoter**

ttgacaattaatcatcggtcgtataatgtgtggaaaggcggtcaccgcccgtttcacacaggaaacagaattctttaagaaggagata  
tacatATGTCAGTGATAGCAAAGCAGATGACATACAAAGTATATATGAGCGGTAAGTAAATG  
GTCACTACTTCGAAGTAGAAGGTGATGGCAAAGGGAAGCCGTATGAGGGTGAACAAACAG  
TGAAGCTTACAGTTACGAAGGGTGGCCCTTTGCCGTTTCGCGTGGGACATTTTGTGCCAC  
AGTGCCAGTACGGGAGCATAACCAAGTATCCAGAGGACATAACCAACTACGTGA  
AACAGTCTTTCCGAAGGCTATACCTGGGAGCGCATAATGAACTTTGAAGACGGTGCCG  
TTTTGTACGGTATCGAACGATTCATCAATCCAAGGAAATTGCTTTATTTATCATGTTAAATTT  
CGGGGCTTAACTTTCCGCCAATGGCCCCGTGATGCAGAAGAAAACACTCAGGGCTGGGAAC  
CAAATACCGAGCGCCTTTTCGCTCGGGACGGAATGCTGTTGGGAACAATTTTATGGCGTT  
GAAGCTGGAAGGGGGTGGCCACTATCTCTGTGAATTCAAGACAACATACAAAGCCAAGAA  
GCCTGTCAAGATGCCCGGTTATCACTATGTGGACCGGAAGCTCGATGTCACTAATCACAAC  
AAGGATTATACTTCAGTTGAACAGTGCGAAATTTTCGATCGCTCGCAAACCTGTCTGATGCAT  
AA

**Sequence 5 – *tsPurple* with apFAB46 promoter**

AGGCCTtctagagtcgacctgcaaaaaagagtattgacttcgcatctttgtacctataatagattcattactagagaaagaggaga  
aatactagATGGCGTCCCTTGTAAGAAGGATATGTGTGTTAAGATGACAATGGAGGGAACCG  
TCAACGGGTATCACTTTAAGTGTGTTGGCGAGGGAGAAGGCAAACCGTTCGAGGGTACAC  
AGAATATGCGCATTTCGTGTCACCGAAGGGGGCCCTTTGCCCTTTGCTTTTCGATATTTTGGC  
CCCGTGCTGTATGTATGGTTCGAAGACTTTTATCAAACACGTAAGCGGAATCCCTGACTAC  
TTCAAGGAGAGCTTTCCCGAAGGCTTTACTTGGGAACGTACGCAGATTTTTGAAGACGGAG  
GAGTTTTGACTGCCCATCAAGATACATCACTTGAGGGAACTGTTTAATCTACAAAGTTAAG  
GTGTTAGGGACAAATTTTCCTGCCAATGGTCCGGTTATGCAGAAAAGACAGCAGGCTGG  
GAACCGTGTGTAGAGATGTTGTACCCCGCGACGGGGTTCTTTGCGGGCAATCCCTTATG  
GCCTTGAAATGTAAGTACTGATGGAAATCACTTGACATCCCATTTACGCACCACTTATCGCTCGC  
GTAAGCCAAGTAATGCGGTGAACATGCCGGAATTTCACTTCGGAGACCATCGTATTGAAAT  
CTTGAAAGCCGAACAAGGAAAATTTTATGAACAATACGAATCCGCAGTGGCACGTTATTCA  
GATGTTCCAGAAAAGGCGACTTGATAAggcatgcaagcttgctggt

**Sequence 6 – J23119 promoter with synthetic ribosome binding site**

TTGACAGCTAGCTCAGTCCTAGGTATAATGCTAGCTGAGAAAAGAAAGGGAAACTAAGGAG  
GTATTTT

## **Supplemental Text 2**

Those working with species intrinsically resistant to or strains with acquired resistance to chloramphenicol and gentamicin might want to replace the antibiotic selection cassette.

A general one step isothermal assembly approach is to linearize the appropriate pTOX vector with:

Forward primer – acagtactgcatgagtggc

Reverse primer – agatccttggcggcaagaaa

A high fidelity polymerase such as Q5 (NEB) should be used. The PCR reaction should be optimized due to the high GC content of the mobRP4. For example, with Q5, we used 10% GC enhancer in the reaction, doubled the amount of recommended polymerase, and extended the elongation time to 45 seconds per kB.

The desired resistance cassette should then be amplified from an appropriate template. To facilitate isothermal assembly, we have found the following overlaps (complementary to the linearized vector above) to be effective:

Forward primer overlap – gccctgccactcatcgagtactgt

Reverse primer overlap - CAAGTGCCTGTtttcttgccccaaggatct



## **SUPPLEMENTAL TABLE 1** Plasmids used in this study

|                                 |                                                                          |
|---------------------------------|--------------------------------------------------------------------------|
| pDS132                          | From Philippe <i>et al.</i>                                              |
| pON.mCherry                     | From Gebhardt <i>et al.</i>                                              |
| PGR-Blue                        | From Bradshaw <i>et al.</i>                                              |
| pSB3C5-<br>proD-B0032-<br>E0051 | From Davis <i>et al.</i>                                                 |
| pSLC-239                        | From Khetrapal <i>et al.</i>                                             |
| pSLC-241                        | "                                                                        |
| pSLC-246                        | "                                                                        |
| pTOX1                           | This work. Encodes the YhaV toxin. CAM <sup>R</sup>                      |
| pTOX2                           | This work. Encodes the MqsR toxin. CAM <sup>R</sup>                      |
| pTOX3                           | This work. Encodes the Tse2 toxin. CAM <sup>R</sup>                      |
| pTOX4                           | This work. Encodes the YhaV toxin and <i>amilCP</i> . CAM <sup>R</sup>   |
| pTOX5                           | This work. Encodes the MqsR toxin and <i>amilCP</i> . CAM <sup>R</sup>   |
| pTOX6                           | This work. Encodes the Tse2 toxin and <i>amilCP</i> . CAM <sup>R</sup>   |
| pTOX7                           | This work. Encodes the YhaV toxin and <i>tsPurple</i> . CAM <sup>R</sup> |
| pTOX8                           | This work. Encodes the MqsR toxin and <i>tsPurple</i> . CAM <sup>R</sup> |
| pTOX9                           | This work. Encodes the Tse2 toxin and <i>tsPurple</i> . CAM <sup>R</sup> |
| pTOX10                          | This work. Encodes the YhaV toxin. Gent <sup>R</sup>                     |
| pTOX11                          | This work. Encodes the MqsR toxin. Gent <sup>R</sup>                     |
| pTOX12                          | This work. Encodes the Tse2 toxin. Gent <sup>R</sup>                     |

## **References**

Bradshaw JC, Gongola AB, Reyna NS. 2016. Rapid Verification of Terminators Using the pGR-Blue Plasmid and Golden Gate Assembly. *J Vis Exp*.

Davis JH, Rubin AJ, Sauer RT. 2011. Design, construction and characterization of a set of insulated bacterial promoters. *Nucleic Acids Res* 39:1131–1141.

Gebhardt MJ, Jacobson RK, Shuman HA. 2017. Seeing red; the development of pON.mCherry, a broad-host range constitutive expression plasmid for Gram-negative bacteria. *PLoS One* 12:e0173116.

Khetrapal V, Mehershahi K, Rafee S, Chen S, Lim CL, Chen SL. 461 2015. A set of powerful negative selection systems for unmodified Enterobacteriaceae. *Nucleic Acids Res* 43:e83.

Philippe N, Alcaraz J-P, Coursange E, Geiselmann J, Schneider D. 2004. Improvement of pCVD442, a suicide plasmid for gene allele exchange in bacteria. *Plasmid* 51:246–255.
